# Supplementary material for: Composite Biomarkers Derived from Micro-Electrode Array Measurements and Computer Simulations Improve the Classification of Drug-Induced Channel Block
Source: PubMed Central journal article supplement (PMC5762138; doi:10.3389/fphys.2017.01096), 2018-01-04
Supplement: DataSheet1.pdf [file DataSheet1.pdf]

## APPENDIX: COMPUTATION OF THE BIOMARKERS

646 In this section, we provide details on how to compute the biomarkers from FP time series as shown in  
 647 Figure 2. For a given signal, we denote by  $t$  the time vector and  $y$  the FP. Each signal is divided into two  
 648 parts: the depolarization region  $(t_1, y_1)$  from  $t = 0$  to  $t = 100$  ms and the repolarization region  $(t_2, y_2)$   
 649 from  $t = 100$  to  $t = 1200$  ms.

650 *Depolarization amplitude (DA)*

651 The DA is simply defined as the difference between the maximum and minimum values of the potential  
 652 during the depolarization:

$$DA = \max(y_1) - \min(y_1). \quad (17)$$

653

654 *Depolarization width (DW)*

655 The DW is defined as the total duration during which the field potential is above, in absolute value, 10%  
 656 of its peak value:

$$DW = \int_{t_1 \in I} dt_1, \quad (18)$$

657 where  $I = \{t_1 \mid |y_1(t_1)| \geq 0.1 \times \max(|y_1|)\}$

658 *Repolarization amplitude (RA)*

659 The RA is defined as the maximum (in absolute value) of the repolarization.

$$RA = \max(|y_2|). \quad (19)$$

660 *Field potential duration (FPD)*

661 The FPD is defined as the time difference between the maximum (in absolute value) of the depolarization  
 662 and the maximum (in absolute value) of the repolarization. Let  $t_d = t \left[ \operatorname{argmax}_t (|y_2(t)|) \right]$  and  $t_r =$   
 663  $t \left[ \operatorname{argmax}_t (|y_1(t)|) \right]$ . Then,

$$FPD = t_r - t_d. \quad (20)$$

664 *Area under the curve of the repolarization wave (AUCr)*

665 The AUCr is defined as the area under the curve of  $y_2$  truncated around  $\pm \Delta t$  of  $t_r$ . We used  $\Delta t = 100$ ms.  
 666 The integral is approximated using the trapezoidal rule.

$$AUCr = \left| \int_{t_r - \Delta t}^{t_r + \Delta t} y_2(t) dt \right| \quad (21)$$

667 *Repolarization center (RC)*

668 The RC is defined as the offset of the barycenter (with respect to time) of the repolarization wave.

$$\text{RC} = \int_{t_r - \Delta t}^{t_r + \Delta t} t \bar{y}_2(t) dt - t_d, \quad (22)$$

669 where  $\bar{y}_2(t)$  is a non-dimensional rescaling of  $y_2(t)$  so that it is strictly positive and integrates to 1 on  
670  $[t_r - \Delta t, t_r + \Delta t]$ .  $\bar{y}_2(t)$  may be seen as a probability density function over the domain  $[t_r - \Delta t, t_r + \Delta t]$ .

671 *Repolarization width (RW)*

672 The RW is defined as the standard deviation of the repolarization wave.

$$\text{RW} = \left[ \int_{t_r - \Delta t}^{t_r + \Delta t} t^2 \bar{y}_2(t) dt - \left( \int_{t_r - \Delta t}^{t_r + \Delta t} t \bar{y}_2(t) dt \right)^2 \right]^{1/2}. \quad (23)$$

673

674 *Field potential notch (FPN)*

675 The FPN is defined as the potential value 4ms after  $t_d$ . The FPN value is smoothed out by multiplying  
676 the signal with a test function and then integrates the product. This proves to be less sensitive to noise than  
677 just a point-wise evaluation. Let  $\phi(t_1) = \exp \left[ -\frac{(t_1 - (t_d + 4))^2}{.04} \right]$ . Then,

$$\text{FPN} = \int_{t_1} y_1(t_1) \phi(t_1) dt_1. \quad (24)$$

678

679 *Conduction velocity (CV)*

680 The CV is defined as the velocity of the depolarization wave. Since there are 9 electrodes in the studied  
681 MEA device, one can identify the first electrode, denoted by  $e_a$ , to detect the depolarization peak at time  $t_a$   
682 and the last one, denoted by  $e_b$ , at time  $t_b$ . The velocity is then defined as follows:

$$\text{CV} = \frac{\sqrt{(x_{e_b} - x_{e_a})^2 + (y_{e_b} - y_{e_a})^2}}{t_b - t_a}. \quad (25)$$

683 Note that this is the only biomarker for which we do not take statistics (median, mean, etc.) over the  
684 electrodes since there is only one value for all nine electrodes.
